# Supplementary material for: Pneumatic tube transportation of urine samples
Source: publisher site journal article supplement (doi:10.1515/cclm-2020-1198), 2020-11-23

**Supplemental material 4 – graphs, soluble components**

**Albumin**


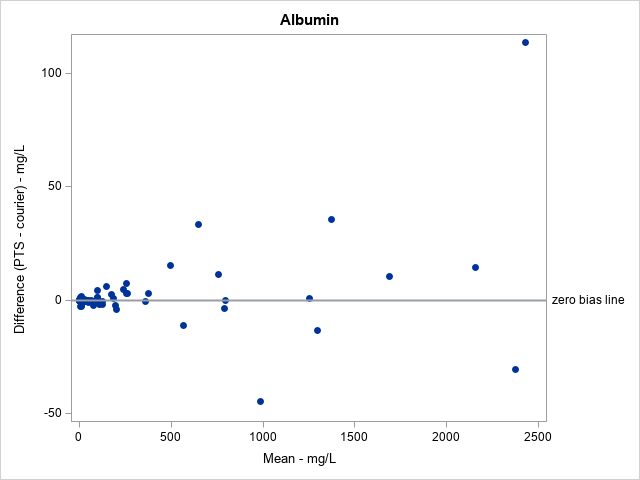


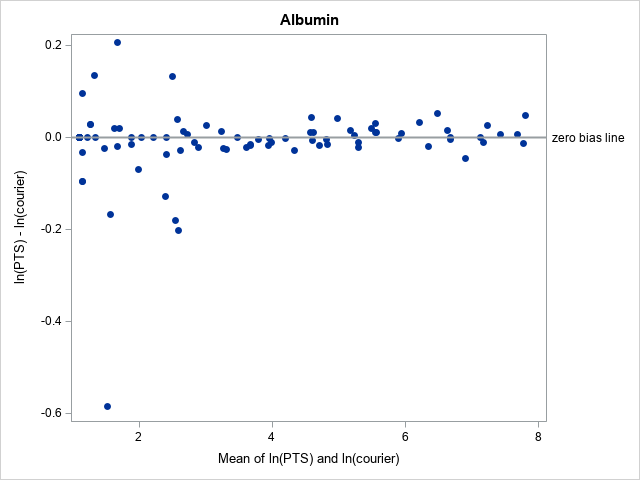


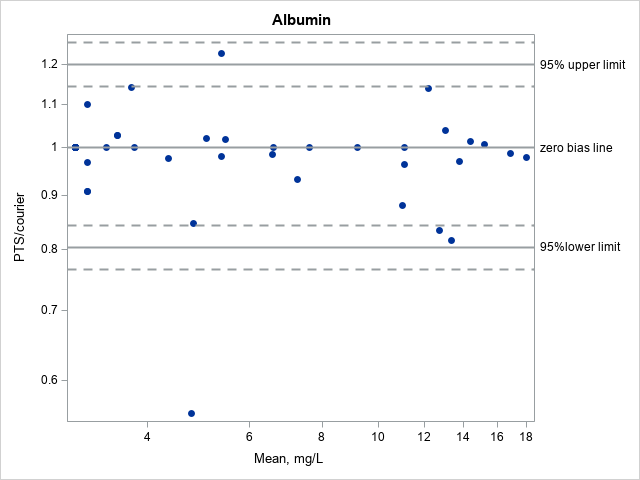


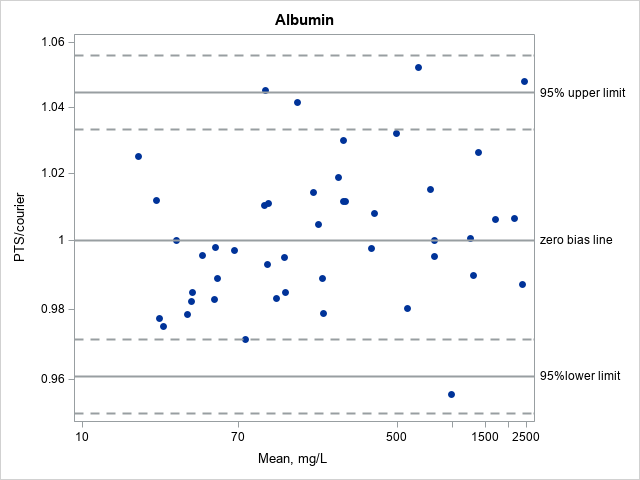


**Albumin-to-Creatinine Ratio**


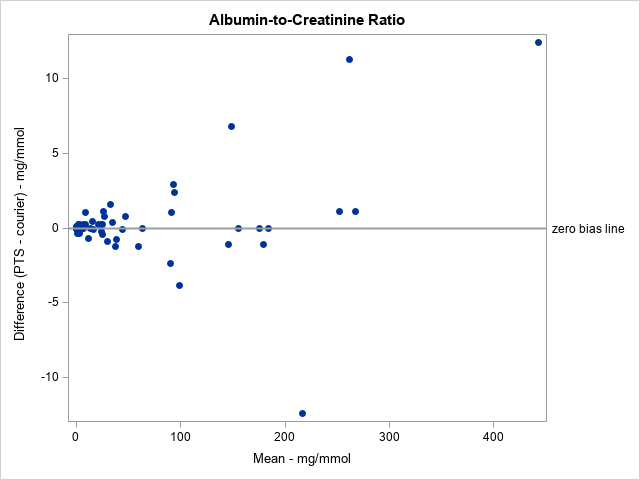


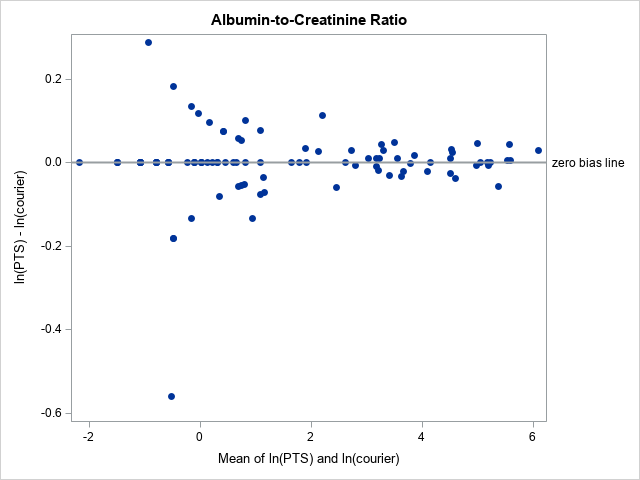


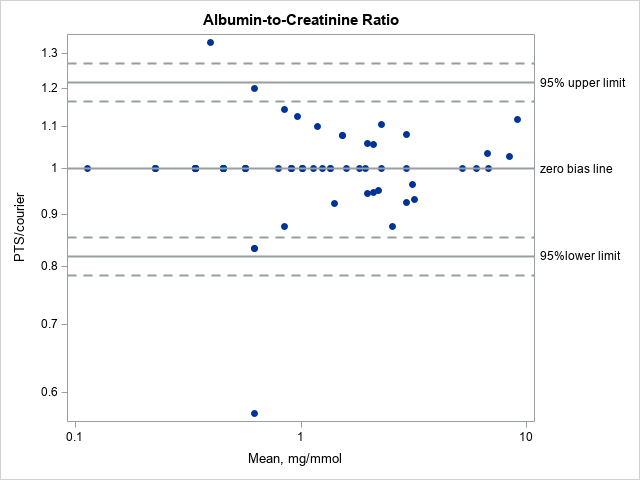


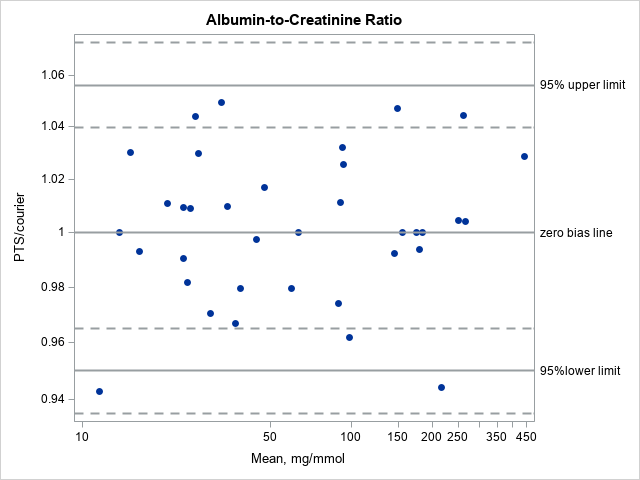


**Urea Nitrogen**


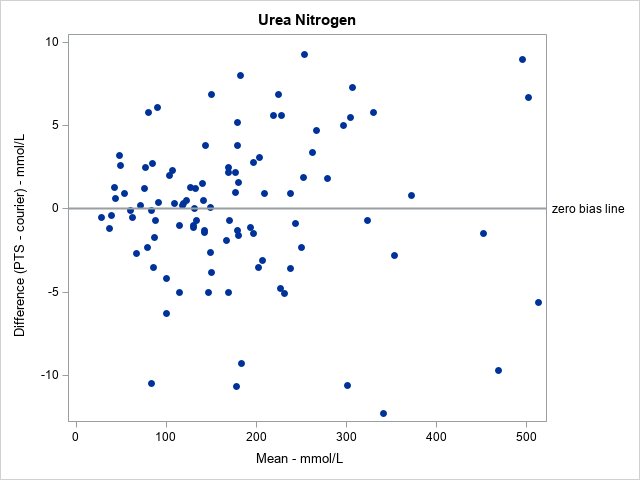


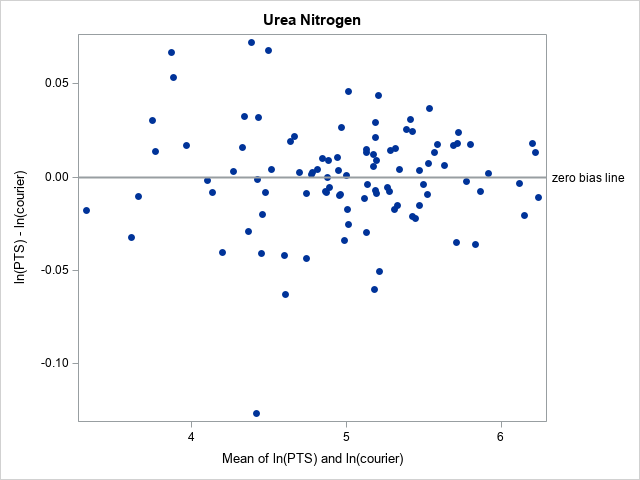


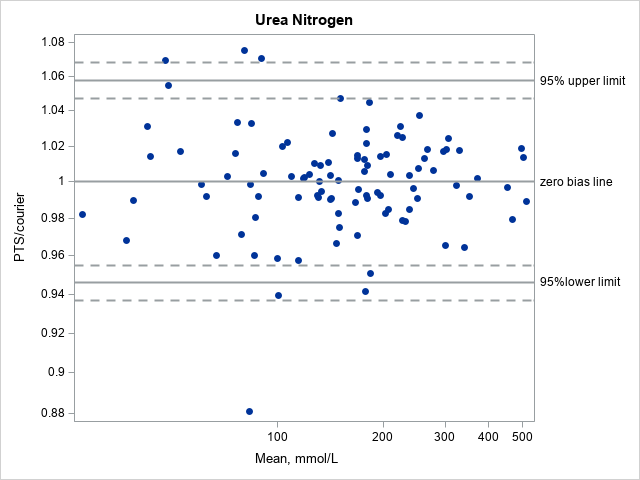


**Creatinine**


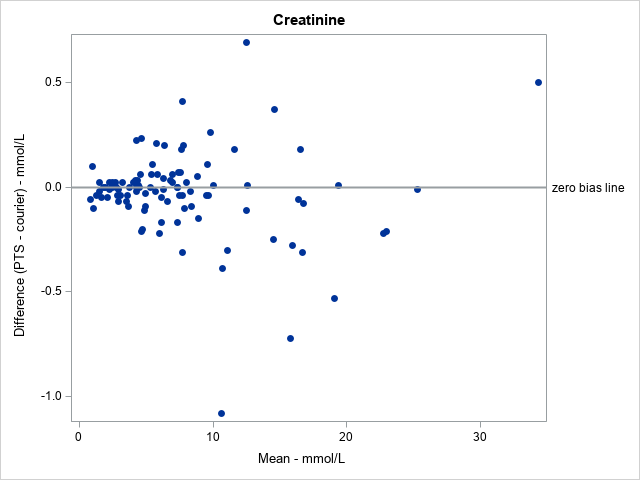


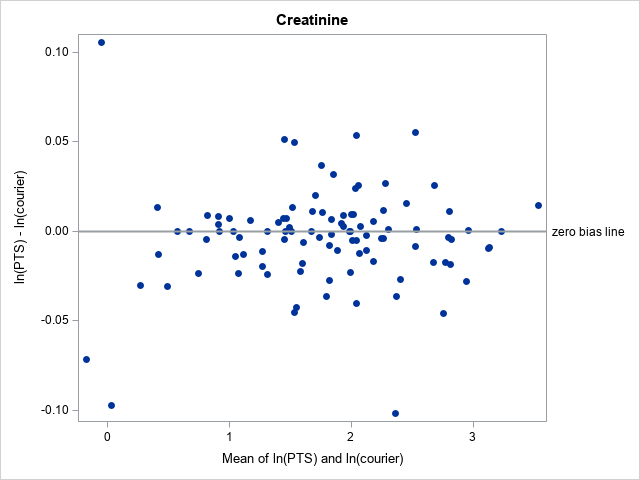


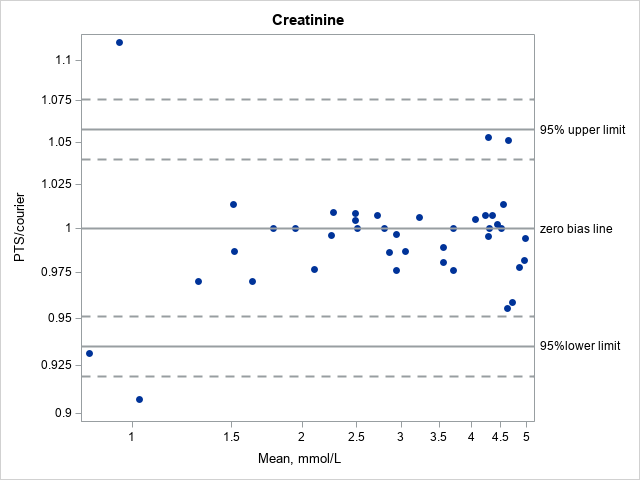


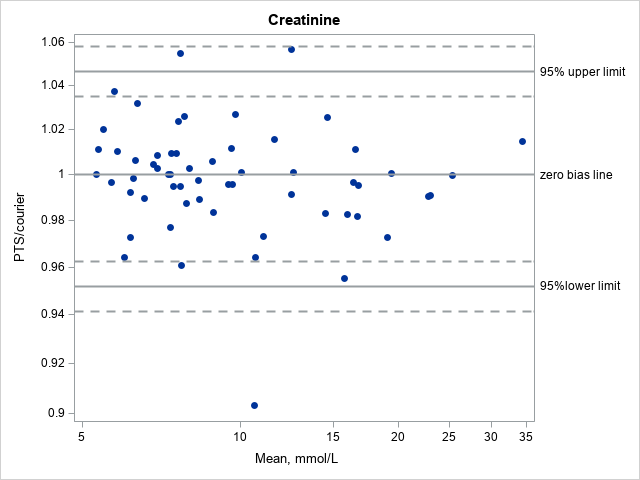


**Potassium**


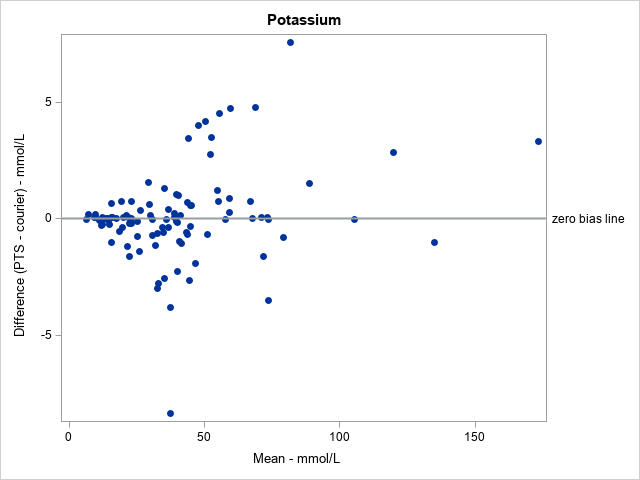


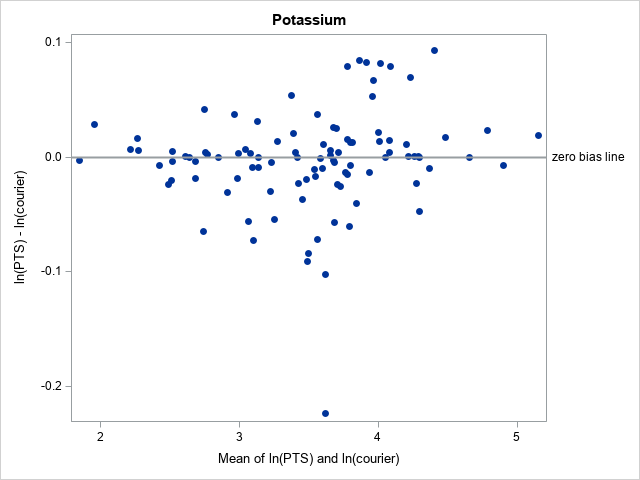


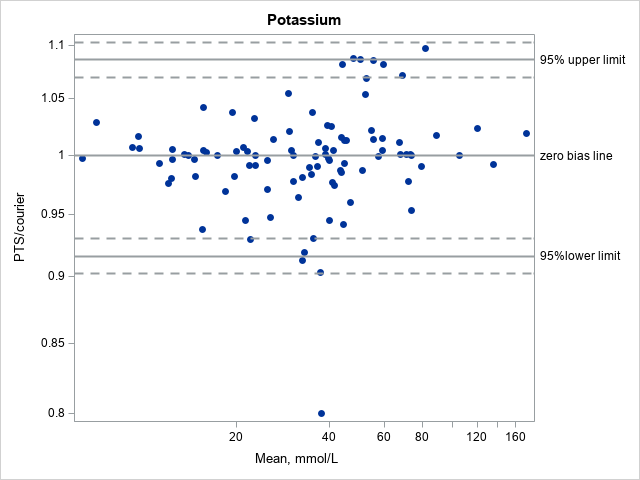


**Protein**


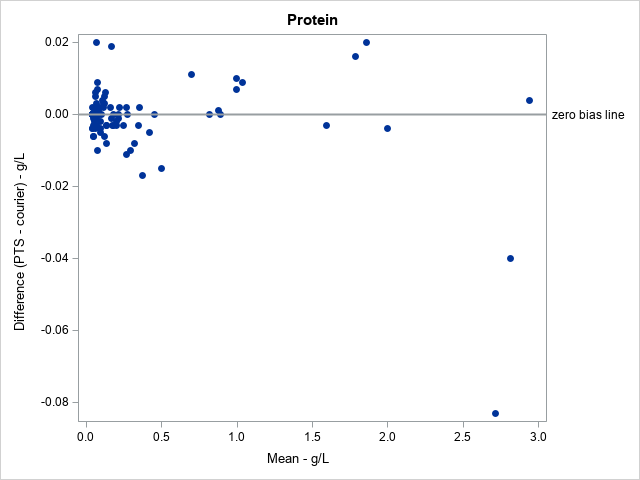


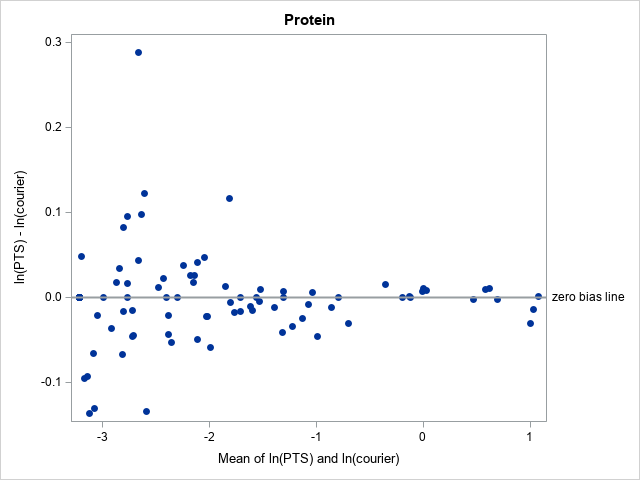


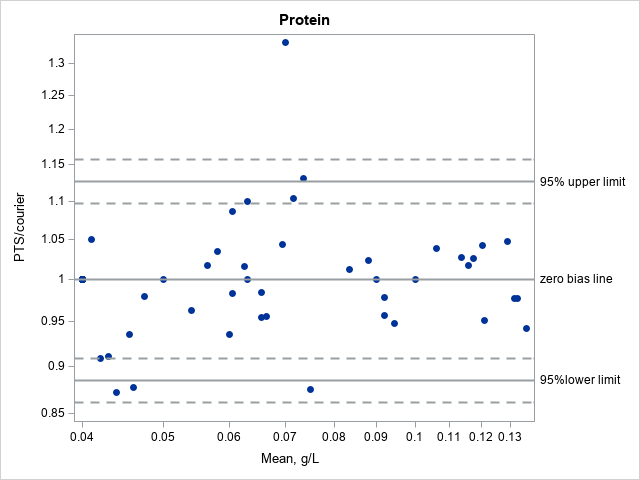


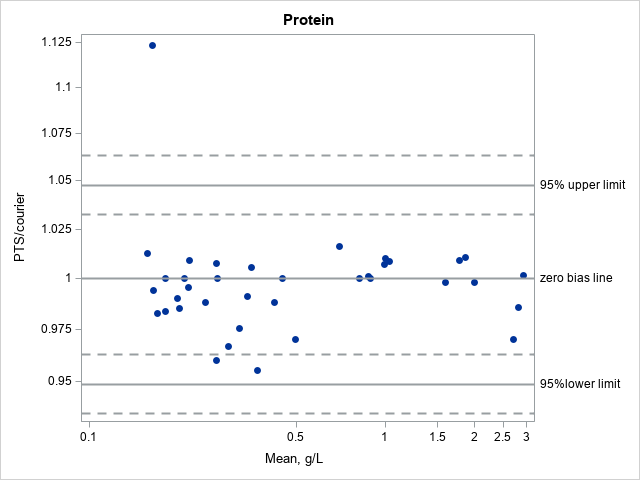


**Sodium**


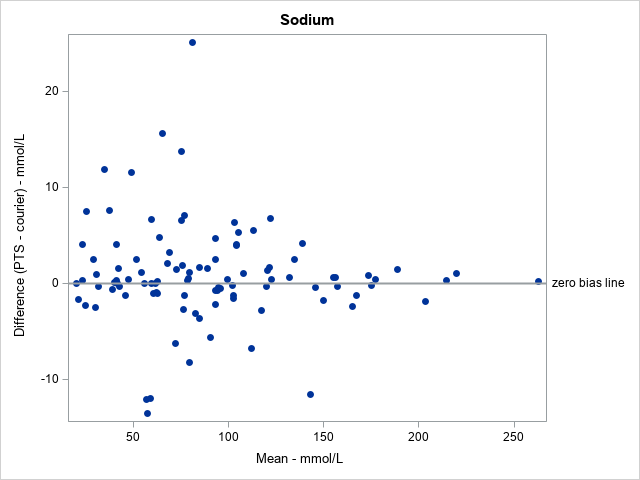


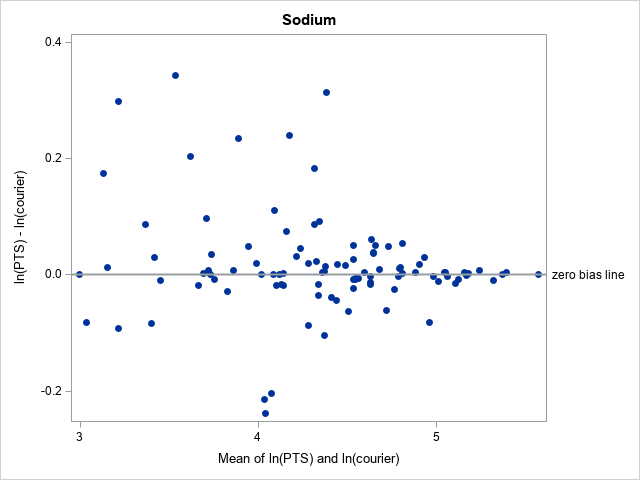


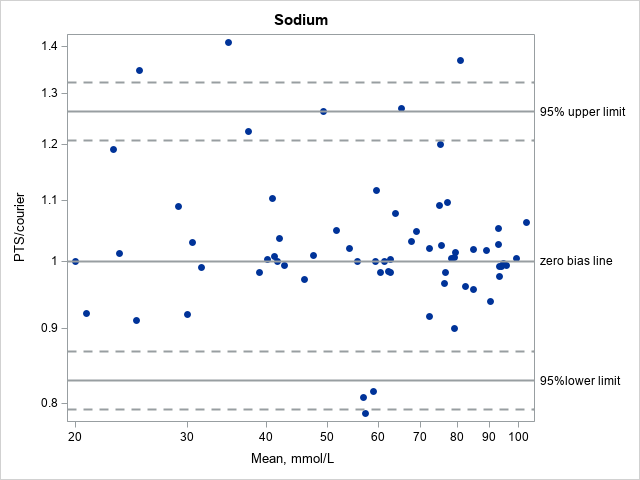


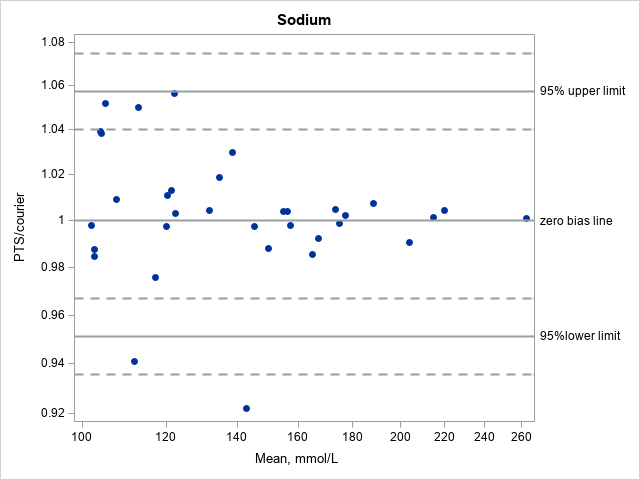

Supplement: Supplementary file 4 [file j_cclm-2020-1198_suppl_004.docx]
