# Supplementary material for: Pneumatic tube transportation of urine samples
Source: publisher site journal article supplement (doi:10.1515/cclm-2020-1198), 2020-11-23

**Supplemental material 5 – figures, particles**

**Bacteria**


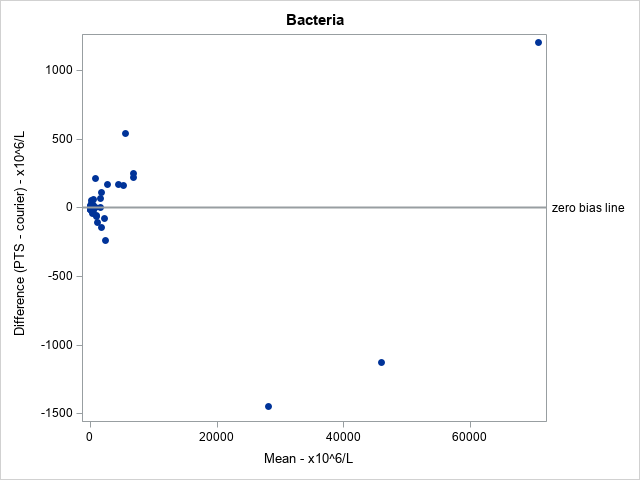


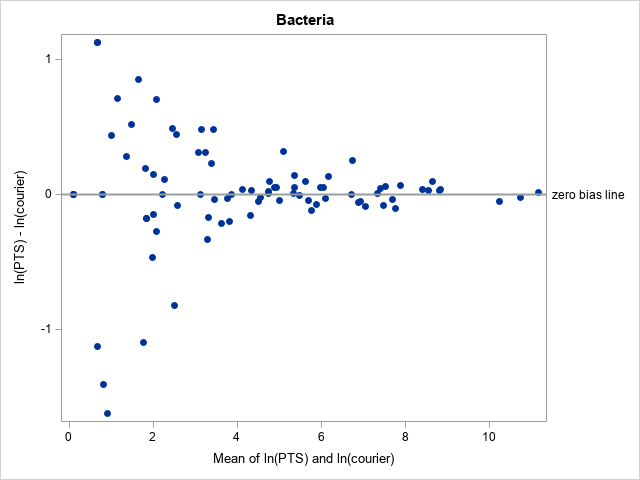


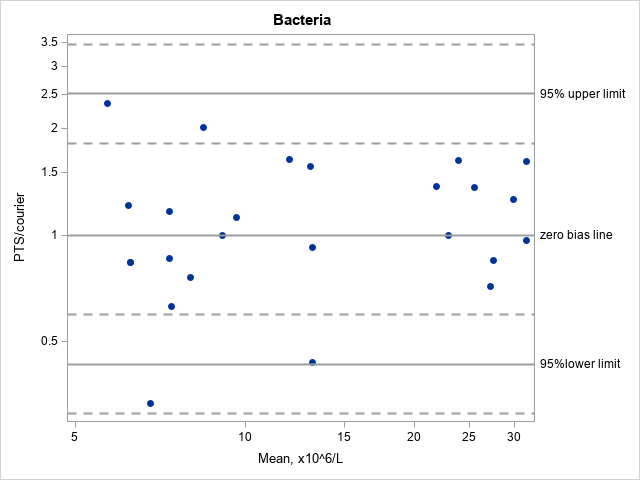


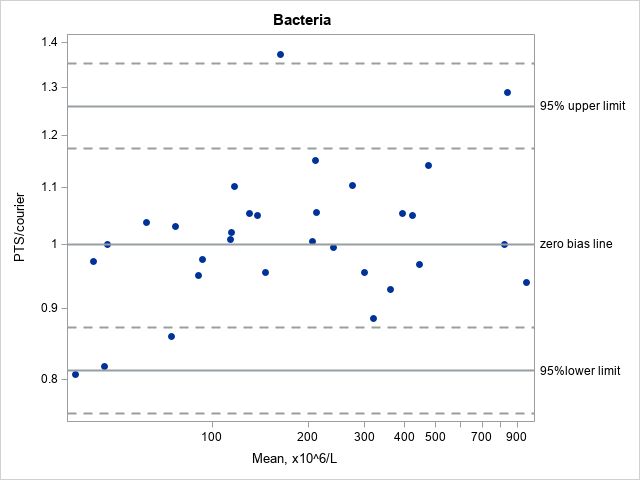


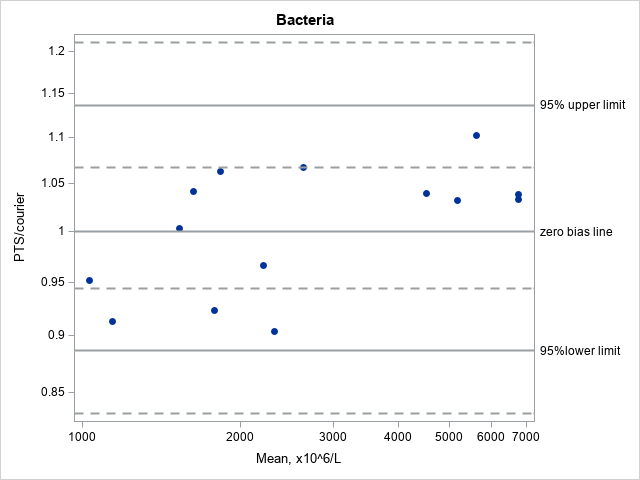


**Hyaline Casts**


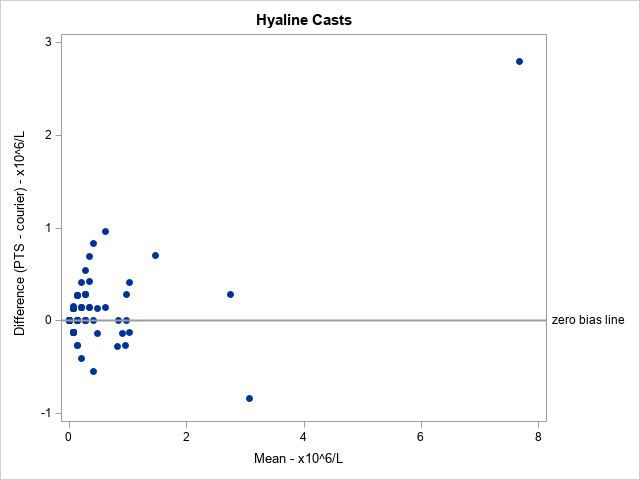


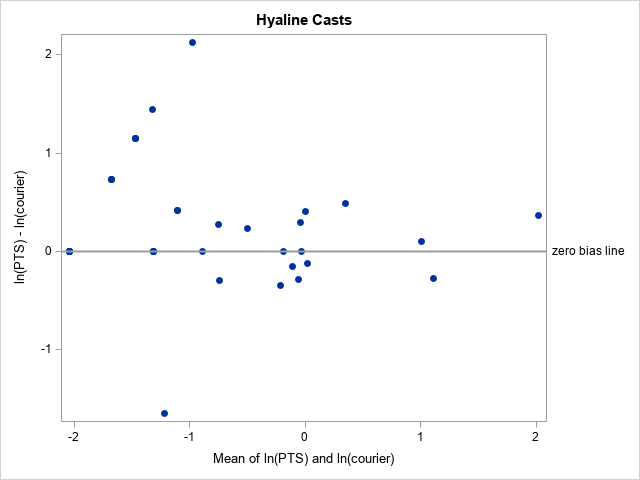


**Pathological Casts**


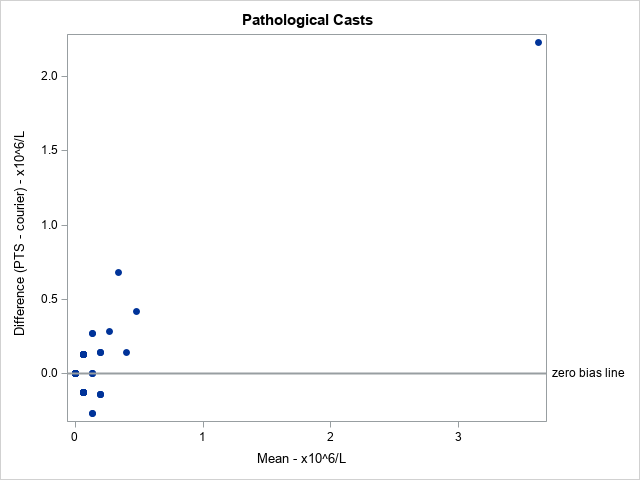


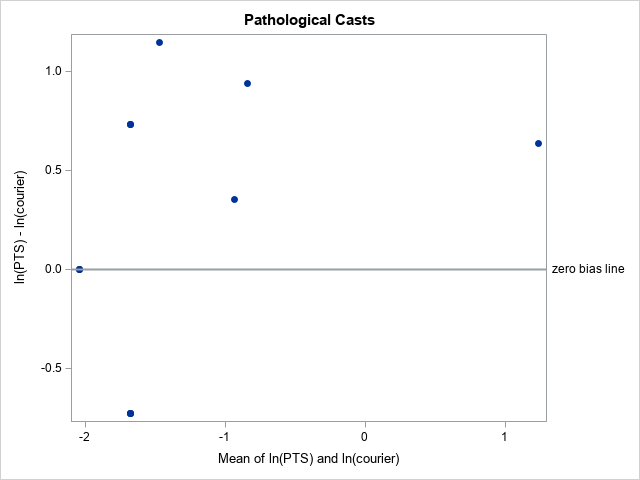


**Crystals**


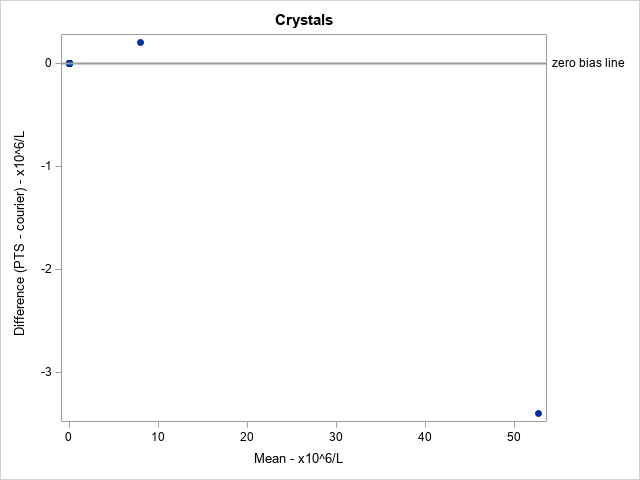


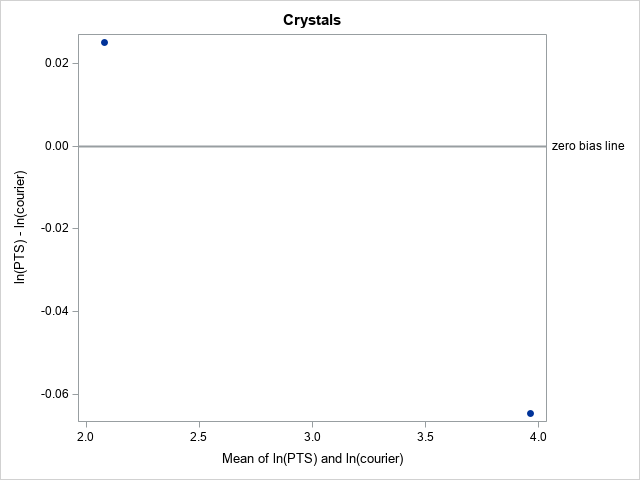


**Renal Tubular Epithelial Cells**

**
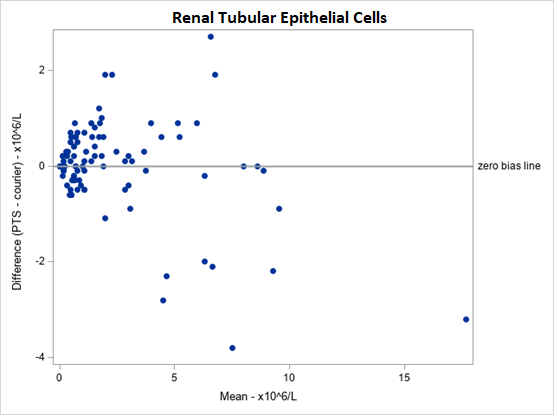
**

**
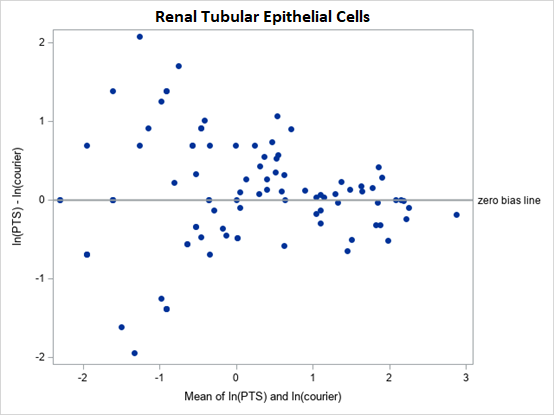
**

**
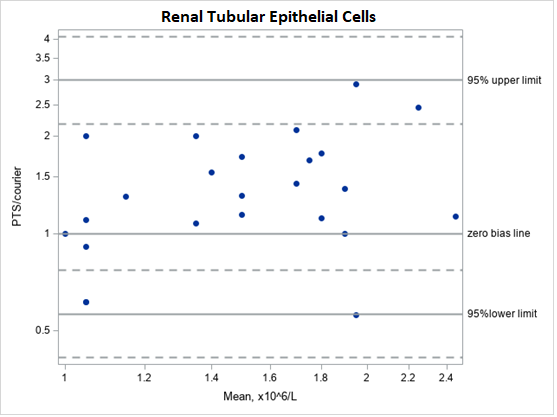
**

**
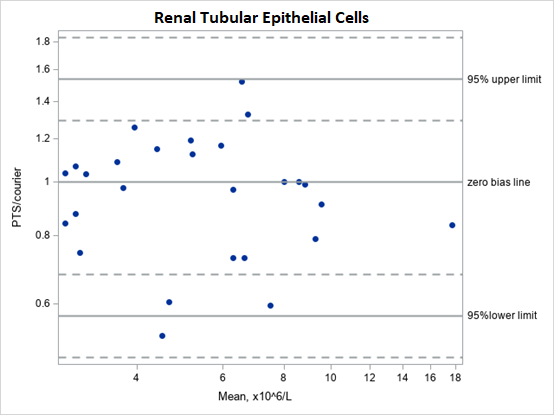
**

**Squamous Epithelial Cells**


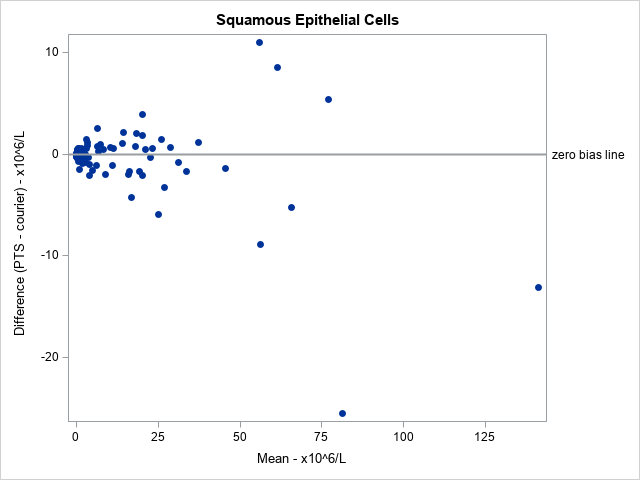


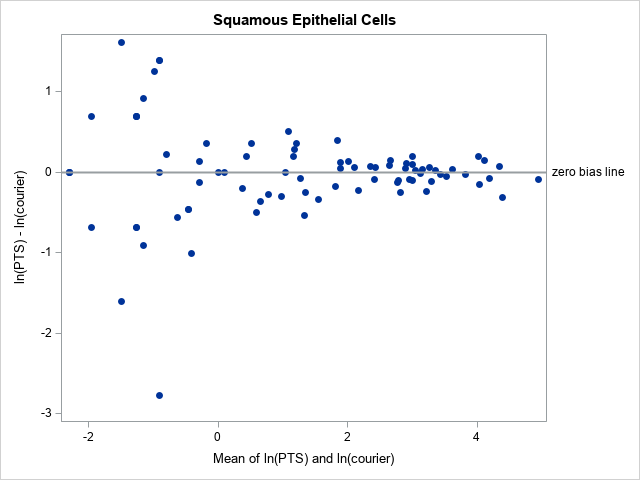


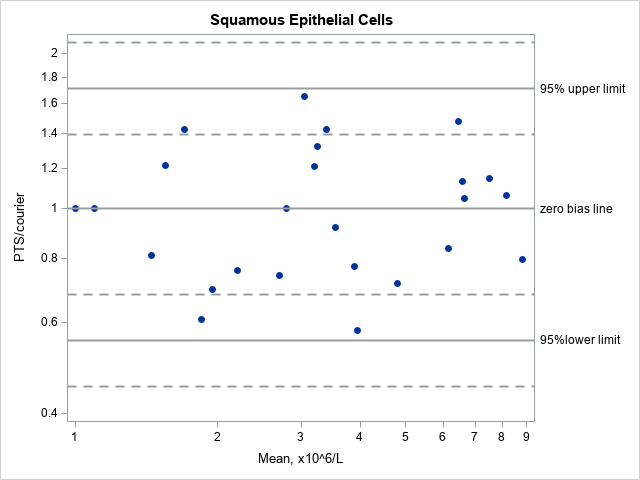


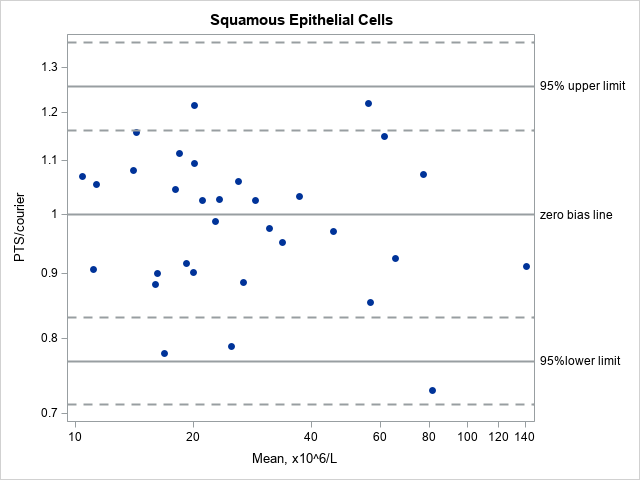


**Transitional Epithelial Cells**


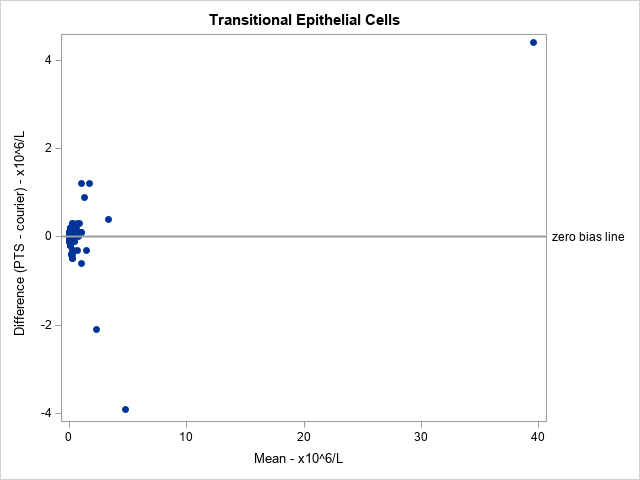


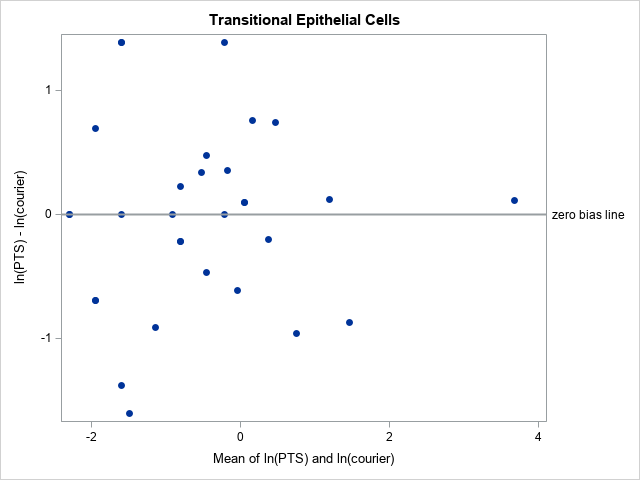


**Red Blood Cells**


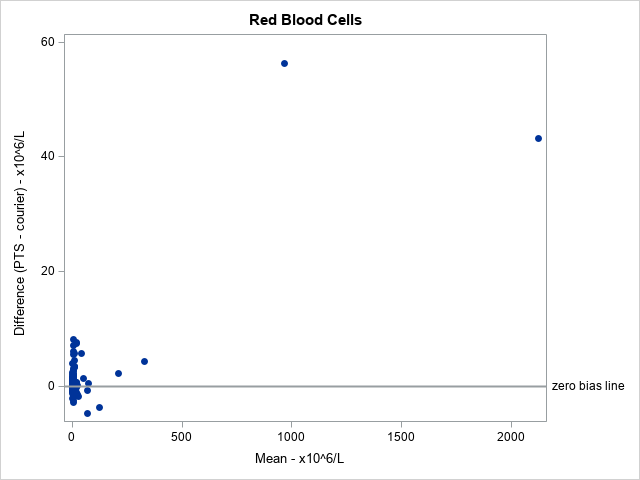


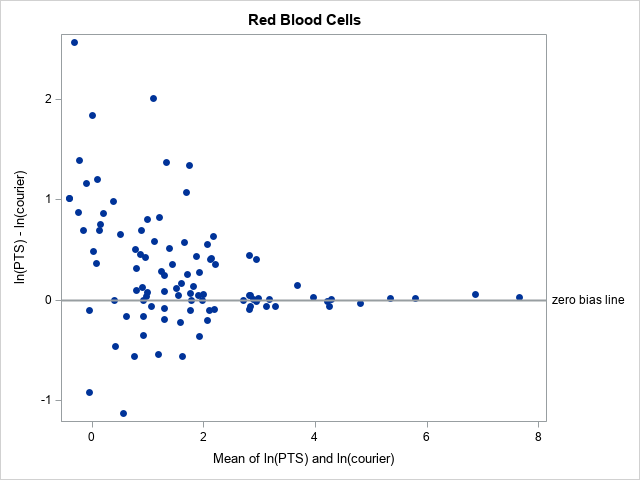


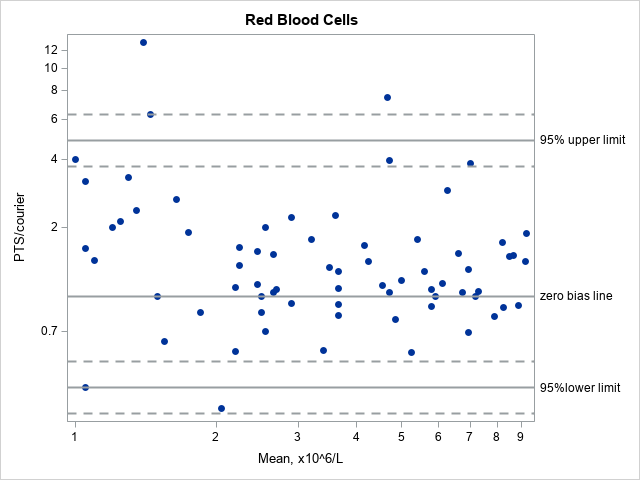


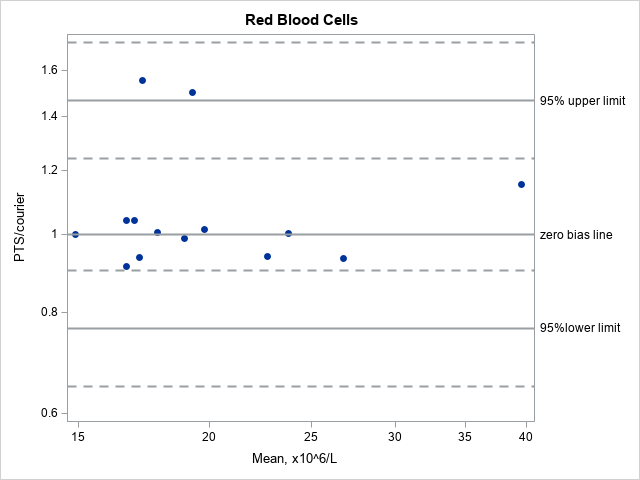


**Non-lysed Red Blood Cells**


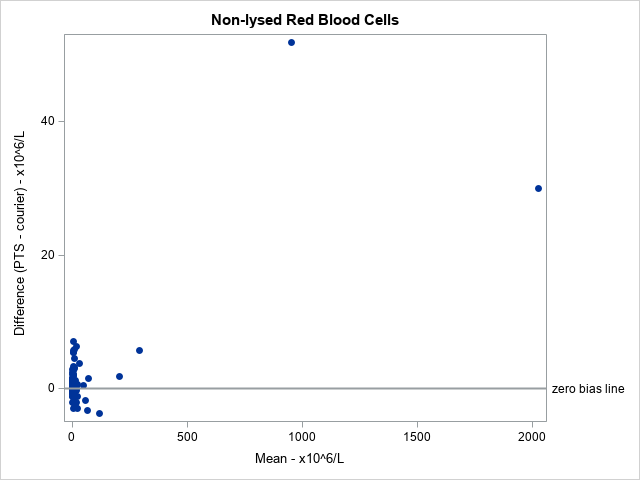


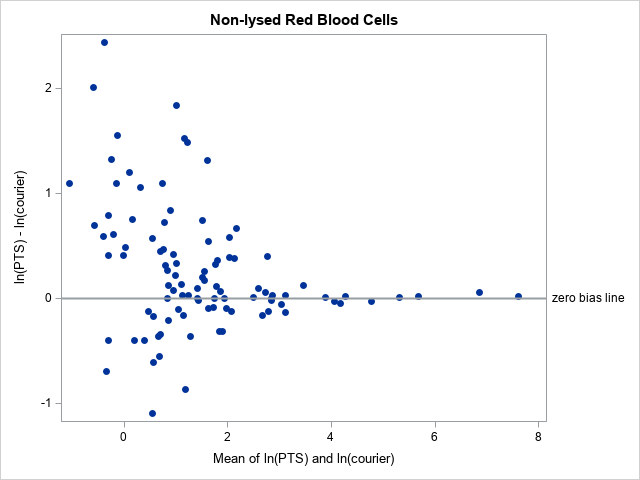


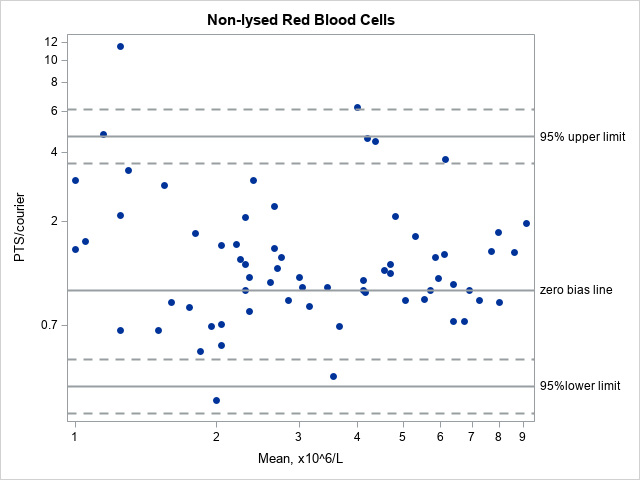


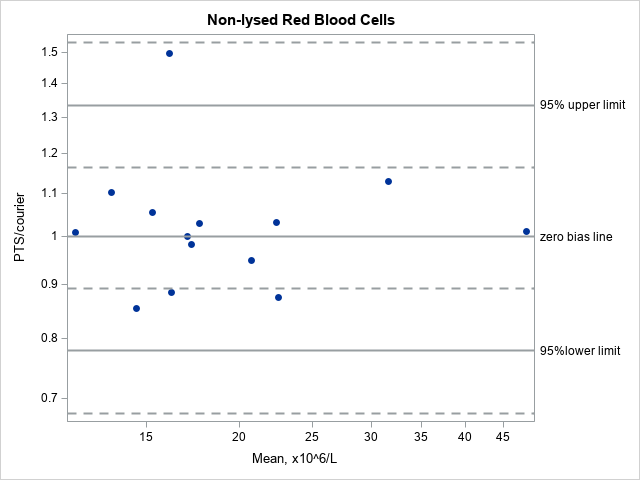


**Spermatozoa**

**
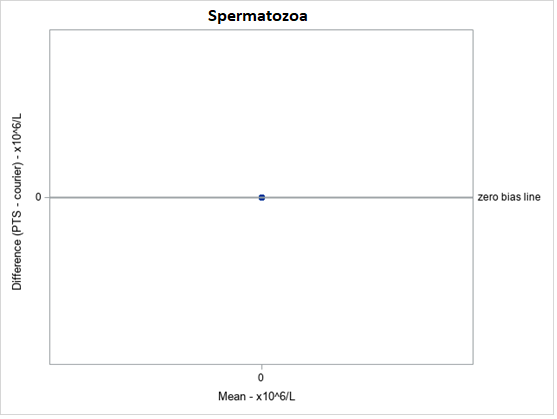
**

**White Blood Cells**


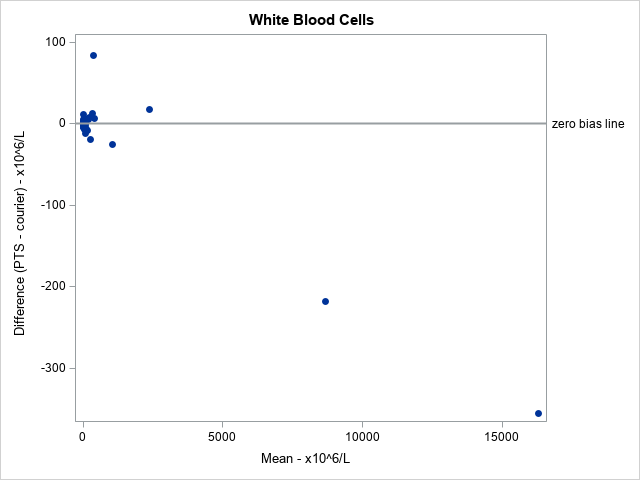


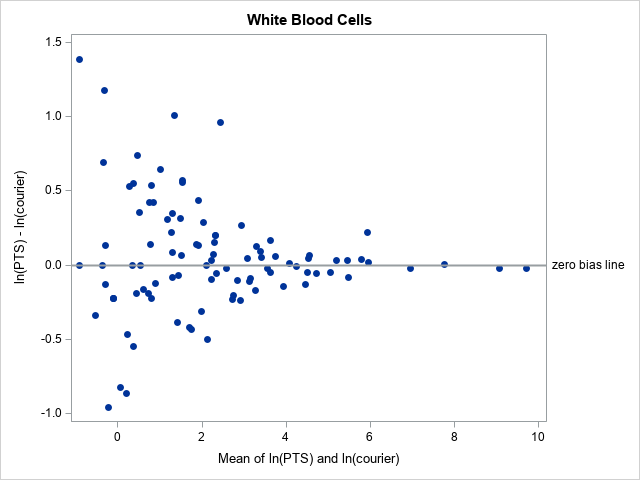


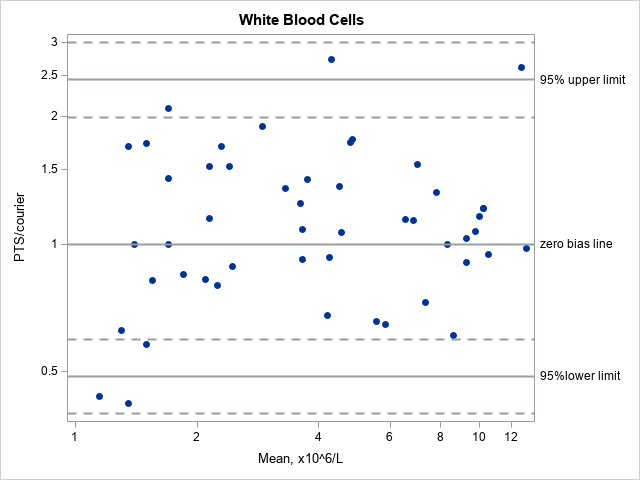


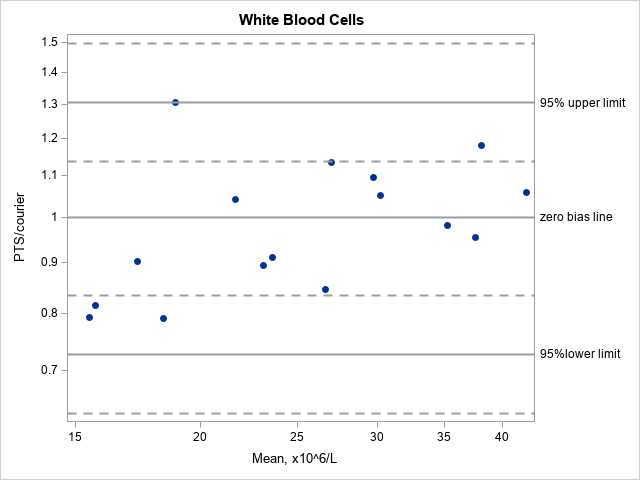


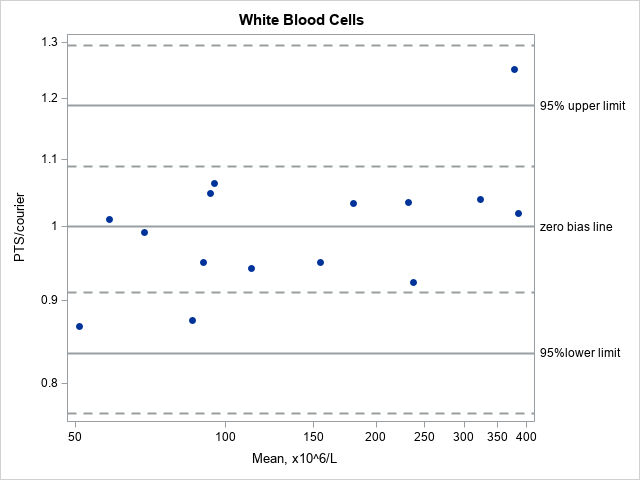


**Yeast-like Cells**


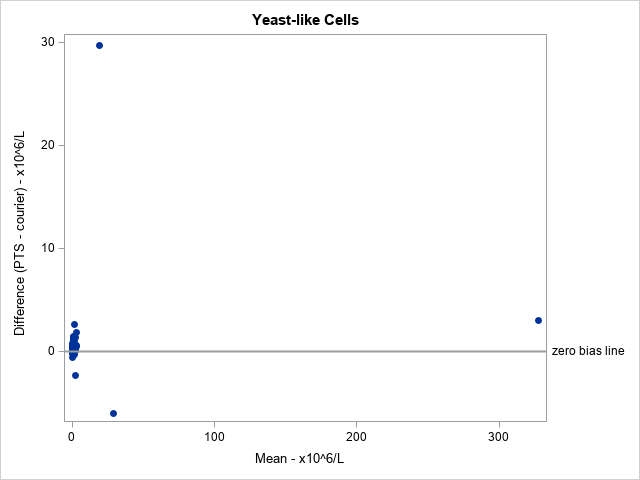


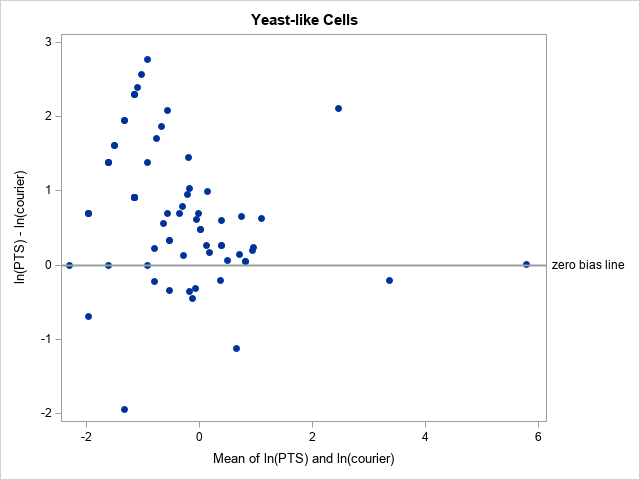


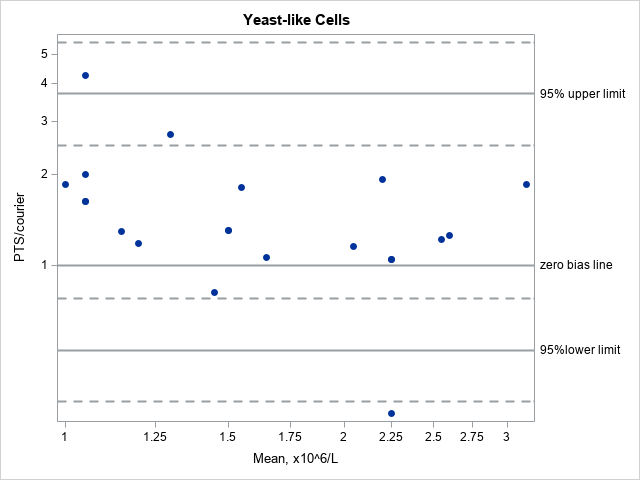

Supplement: Supplementary file 5 [file j_cclm-2020-1198_suppl_005.docx]
