# Supplementary material for: Pneumatic tube transportation of urine samples
Source: publisher site journal article supplement (doi:10.1515/cclm-2020-1198), 2020-11-23
Supplement: Supplementary file 1 [file j_cclm-2020-1198_suppl_001.docx]

**Supplemental material 1 – SAS-code for data processing**

libname TESTbib 'C:\Users\e8irtu\Desktop';

libname testbib2 'C:\Users\e8irtu\Desktop';

libname testbib3 'C:\Users\e8irtu\Desktop';

**data** kvantitet;

set EGTASK.'BCC OG UF SAMLET_0005'n;

gennemsnit=(resultat_1 + resultat_2)/**2**;

**run**;

**Data** Kvantitet1;

set kvantitet;

If kvntnr=**1596** and gennemsnit>=**0.15** then do; Level=">/=0.15"; unit="g/L "; log="% ";

name='PROTEINHIGH '; end;

If kvntnr=**1596** and gennemsnit<**0.15** then do; Level="<0.15"; unit="g/L"; log ="%"; name='PROTEINLOW'; end;

If kvntnr=**68** then do; resultat_1= (resultat_1/**8.84**); resultat_2=(resultat_2/**8.84**); gennemsnit=(gennemsnit/**8.84**); end;

If kvntnr=**68** and gennemsnit>=**10** then do; Level=">/=10";name="ALBKREAHIGH"; unit="mg/mmol"; log="%"; end;

If kvntnr=**68** and gennemsnit<**10** then do; Level="<10";Name="ALBKREALOW"; unit="mg/mmol"; end;

If kvntnr=**67** and gennemsnit<**20** then do; Level="<20";name="ALBUMINLOW"; unit="mg/L"; end;

If kvntnr=**67** and gennemsnit>=**20** then do; Level=">/=20"; name="ALBUMINHIGH";unit="mg/L"; log="%"; end;

If kvntnr=**1078** and gennemsnit<**30** and gennemsnit>=**10** then do; Level="low"; Name="POTASSIUM"; unit="mmol/L"; log="%"; end;

If kvntnr=**306** then do; Level="All"; name="BUN";unit="mmol/L"; log="%"; end;

If kvntnr=**473** and gennemsnit<**5** then do; Level="<5"; name="CREATININELOW"; unit="mmol/L"; end;

If kvntnr=**473** and gennemsnit>=**5** then do; Level=">/=5"; name="CREATININEHIGH"; unit="mmol/L"; log="%"; end;

If kvntnr=**1346** and gennemsnit<**100** then do; Level="<100"; name="SODIUMLOW"; unit="mmol/L"; log="%"; end;

If kvntnr=**1346** and gennemsnit>=**100** then do; Level=">/=100"; name="SODIUMHIGH"; unit="mmol/L"; log="%"; end;

If kvntnr=**4617** and gennemsnit<**10** and gennemsnit>=**1** then do; Level="<50"; name="RBCLOW"; unit="x10^6/L"; end;

If kvntnr=**4617** and gennemsnit<**50** and gennemsnit>=**10** then do; Level=">/=50"; name="RBCHIGH"; unit="x10^6/L"; end;

If kvntnr=**1234561** and gennemsnit<**10** and gennemsnit>=**1** then do; Level="<50" ; name="NLRBCLOW"; unit="x10^6/L"; end;

If kvntnr=**1234561** and gennemsnit<**50** and gennemsnit>=**10** then do; Level=">/=50"; name="NLRBCHIGH"; unit="x10^6/L"; end;

If kvntnr=**1234562** and gennemsnit<**15** and gennemsnit>=**1** then do; Level="<100"; name="WBCLOW"; unit="x10^6/L"; end;

If kvntnr=**1234562** and gennemsnit<**50** and gennemsnit>=**15** then do; Level=">/=100"; name="WBCHIGH"; unit="x10^6/L"; log="%"; end;

If kvntnr=**1234565** and gennemsnit<**10** and gennemsnit>=**1** then do; Level="<1"; name="SQECLOW"; unit="x10^6/L"; end;

If kvntnr=**1234565** and gennemsnit>=**10** then do; Level=">/=1"; name="SQECHIGH"; unit="x10^6/L"; log="%"; end;

If kvntnr=**1234567** and gennemsnit<**1** then do; Level="<1"; name="TRECLOW"; unit="x10^6/L"; end;

If kvntnr=**1234567** and gennemsnit>=**1** then do; Level=">/=1"; name="TRECHIGH"; unit="x10^6/L"; log="%"; end;

If kvntnr=**1234568** and gennemsnit<**2.5** then do; Level="<2.5"; name="RTECLOW"; unit="x10^6/L"; end;

If kvntnr=**1234568** and gennemsnit>=**2.5** then do; Level=">/=2.5"; name="RTECHIGH"; unit="x10^6/L"; log="%"; end;

If kvntnr=**12345610** then do; Level="All"; name="HYCASTS"; unit="x10^6/L"; end;

If kvntnr=**12345611** then do; Level="All"; name="PTCASTS"; unit="x10^6/L"; end;

If kvntnr=**4570** and gennemsnit<**1000** and gennemsnit>=**35** then do; Level="<50"; name="BACTLOW"; unit="x10^6/L"; end;

If kvntnr=**4570** and gennemsnit<**10000** and gennemsnit>=**1000** then do; Level=">/=50"; name="BACTHIGH"; unit="x10^6/L"; log="%"; end;

If kvntnr=**12345612** then do; Level="All"; name="XTAL"; unit="x10^6/L"; end;

If kvntnr=**12345613** and gennemsnit<**4** and gennemsnit>=**1** then do; Level="<5"; name="YLCLOW"; unit="x10^6/L"; end;

If kvntnr=**12345613** and gennemsnit>=**4** then do; Level=">/=5"; name="YLCHIGH"; unit="x10^6/L"; end;

If kvntnr=**12345614** then do; Level="All"; name="SPERM"; unit="x10^6/L"; end;

**Run**;

**Proc** **sort** data=kvantitet1;

by kvntnr descending name;

**run**;

**proc** **summary** data=kvantitet1;

by notsorted Kvntnavn kvntnr level unit log name;

output out=data5 min(resultat_1)= Min median(resultat_1)=Median max(resultat_1)=max;

**run**;

**Data** Data6;

set data5;

drop _type_;

**run**;

**data** testbib.proteinlow testbib.proteinHigh testbib.ALBKREAHigh testbib.ALBKREALow testbib.AlbuminLow testbib.AlbuminHigh

testbib.Potassium testbib.BUN testbib.CreatinineLow testbib.CreatinineHigh testbib.SodiumLow

testbib.SodiumHigh testbib.RBCLow testbib.RBCHigh testbib.NLRBCLow testbib.NLRBCHigh testbib.WBCLow testbib.WBCHigh

testbib.WBCCLow testbib.WBCCHigh testbib.ECLow testbib.ECHigh testbib.SQECLow testbib.SQECHigh testbib.NSQECLow

testbib.NSQECHigh testbib.TRECLOW testbib.TRECHIGH testbib.RTECLow testbib.RTECHigh

testbib.casts testbib.HyCasts testbib.Ptcasts testbib.BactLow testbib.BactHigh testbib.Xtal

testbib.YLCLow testbib.YLCHigh testbib.Sperm testbib.Mucus

;

set kvantitet1;

If name="PROTEINHIGH" then output testbib.ProteinHigh;

IF name="PROTEINLOW" then output testbib.proteinlow;

If name="ALBKREAHIGH" then output testbib.ALBKREAHigh;

If name="ALBKREALOW" then output testbib.ALBKREALow;

If name="ALBUMINLOW" then output testbib.AlbuminLow;

If NAME="ALBUMINHIGH" then output testbib.AlbuminHigh;

If NAME="POTASSIUM" then output testbib.Potassium;

If NAME="BUN" then output testbib.BUN;

If NAME="CREATININELOW" then output testbib.CreatinineLow;

If NAME="CREATININEHIGH" then output testbib.CreatinineHigh;

If NAME="SODIUMLOW" then output testbib.SodiumLow;

If NAME="SODIUMHIGH" then output testbib.SodiumHigh;

If NAME="RBCLOW" then output testbib.RBCLow;

If NAME="RBCHIGH" then output testbib.RBCHigh;

If NAME="NLRBCLOW" then output testbib.NLRBCLow;

If NAME="NLRBCHIGH" then output testbib.NLRBCHigh;

If NAME="WBCLOW" then output testbib.WBCLow;

If NAME="WBCHIGH" then output testbib.WBCHigh;

If NAME="WBCCLOW" then output testbib.WBCCLow;

If NAME="WBCCHIGH" then output testbib.WBCCHigh;

If NAME="ECLOW" then output testbib.ECLow;

If NAME="ECHIGH" then output testbib.ECHigh;

If NAME="SQECLOW" then output testbib.SQECLow;

If NAME="SQECHIGH" then output testbib.SQECHigh;

If NAME="NSQECLOW" then output testbib.NSQECLow;

If NAME="NSQECHIGH" then output testbib.NSQECHigh;

If NAME="TRECLOW" then output testbib.TRECLOW;

If NAME="TRECHIGH" then output testbib.TRECHIGH;

If NAME="RTECLOW" then output testbib.RTECLow;

If NAME="RTECHIGH" then output testbib.RTECHigh;

If NAME="CASTS" then output testbib.casts;

If NAME="HYCASTS" then output testbib.HyCasts;

If NAME="PTCASTS" then output testbib.Ptcasts;

If NAME="BACTLOW" then output testbib.BactLow;

If NAME="BACTHIGH" then output testbib.BactHigh;

If NAME="XTAL" then output testbib.Xtal;

If NAME="YLCLOW" then output testbib.YLCLow;

If NAME="YLCHIGH" then output testbib.YLCHigh;

If NAME="SPERM" then output testbib.Sperm;

If NAME="MUCUS" then output testbib.Mucus;

**run**;

**%macro** bias(dataset);

data testbib2.&dataset;

set testbib.&Dataset;

Name= "&Dataset";

diff= log(resultat_2) - log(Resultat_1);

Middel = (log(resultat_2) + log(Resultat_1))/**2**;

diff_nat= resultat_2 - resultat_1;

middel_nat = (resultat_2 + resultat_1)/**2**;

/*refy=2.5*2;

if mod(_n_,2) = 0

then refx= 0;

else refx = 5;

minrefy=-refy;*/

run;

**%mend** bias;

**proc** **contents** data=testbib._all_ noprint out=contents;

**run**;

**data** _null_;

set contents;

by memname;

if first.memname;

call execute (cats('%bias(',memname,')'));

**run**;

**%macro** Summary(dataset);

proc summary data=testbib2.&dataset;

var diff;

output out=work.&dataset std(diff_nat)=SD std(diff)=SD1 n(diff)= No

mean(diff_nat)= mean_nat mean(diff)=mean mean(resultat_1)=mean_carry

mean(resultat_2)= mean_PTS;

run;

data work.&dataset;

set work.&dataset;

length name $ **20**;

Name= "&Dataset";

df = no -**1**;

selim = sqrt(**3***(SD1*SD1)/no);

semean = sqrt((sd*sd)/no);

t = tinv(**0.975**,df);

usikkerhed_lim = t*selim;

usikkerhed_mean = t*semean;

CImean_low=mean_nat-usikkerhed_mean;

CImean_high= mean_nat+usikkerhed_mean;

lower = mean - **1.96***sd1;

CIlowlow= lower - usikkerhed_lim;

CIlowhigh = lower + usikkerhed_lim;

upper = mean + **1.96***sd1;

CIuplow= upper - usikkerhed_lim;

CIuphigh=upper + usikkerhed_lim;

/*SDa=0.8;

Anadiff= 1.96 * sqrt(2)*SDa;*/

run;

**%mend** summary ;

**data** _null_;

set contents;

by memname ;

if first.memname;

call execute(cats('%summary(',memname,')'));

**run**;

**Data** Added;

set proteinLow proteinHigh ALBKREAHigh ALBKREALow AlbuminLow AlbuminHigh Potassium BUN

CreatinineLow CreatinineHigh SodiumLow SodiumHigh RBCLow RBCHigh NLRBCLow NLRBCHigh WBCLow WBCHigh

WBCCLow WBCCHigh ECLow ECHigh SQECLow SQECHigh NSQECLow NSQECHigh TRECHIGH TRECLOW RTECLow RTECHigh

casts HyCasts Ptcasts BactLow BactHigh Xtal YLCLow YLCHigh Sperm Mucus;

**Run**;

**data** added2;

set added;

upper= (exp(upper)-**1**)***100**;

lower= (exp(lower)-**1**)***100**;

CIlowlow= (exp(CIlowlow)-**1**)***100**;

Ciuphigh= (exp(CIuphigh)-**1**)***100**;

CIlowhigh= (exp(CIlowhigh)-**1**)***100**;

Ciuplow=(exp(Ciuplow)-**1**)***100**;

**run**;

%***_eg_conditional_dropds***(EGTASK.QUERY_FOR_DATA61);

**PROC** **SQL**;

CREATE TABLE data10 AS

SELECT t1.kvntnavn,

t1.kvntnr,

t1.Level,

t1.unit,

t2.No,

t1.Min,

t1.Median,

t1.max,

t2.mean_carry,

t2.mean_pts,

t2.mean_nat,

t2.CImean_low,

t2.CImean_high,

t2.lower,

t2.CIlowlow,

t2.CIlowhigh,

t2.upper,

t2.CIuplow,

t2.CIuphigh

FROM WORK.DATA6 t1

LEFT JOIN WORK.ADDED2 t2 ON (t1.name = t2.name);

**QUIT**;
