# Supplementary material for: Pneumatic tube transportation of urine samples
Source: publisher site journal article supplement (doi:10.1515/cclm-2020-1198), 2020-11-23
Supplement: Supplementary file 2 [file j_cclm-2020-1198_suppl_002.docx]

**Supplemental material 2 – SDa and CV%a**

| **Soluble components (Own Data)** | | | | | | | | | |
| --- | --- | --- | --- | --- | --- | --- | --- | --- | --- |
| **Component** | **Unit** | **Level** | **N** | **SD** | **CV (%)** | **Expected limits** | **Expected limits (%)** |  |  |
| Creatinine | mmol/L | 5.84 | 66 | 0.139 | 2.37 | 0.384 | 6.58 |  |  |
| Creatinine | mmol/L | 12.7 | 61 | 0.268 | 2.10 | 0.743 | 5.83 |  |  |
| Protein | g/L | 0.129 | 52 | 0.00664 | 5.14 | 0.0184 | 14.2 |  |  |
| Protein | g/L | 0.556 | 51 | 0.0103 | 1.86 | 0.0286 | 5.146 |  |  |
| Urea Nitrogen | mmol/L | 136 | 57 | 5.27 | 3.87 | 14.6 | 10.7 |  |  |
| Potassium | mmol/L | 24.8 | 66 | 0.39 | 1.57 | 1.08 | 4.35 |  |  |
| Sodium | mmol/L | 70.9 | 68 | 1.68 | 2.36 | 4.64 | 6.55 |  |  |
| Albumin | mg/L | 14.8 | 53 | 1.72 | 11.6 | 4.76 | 32.2 |  |  |
| Albumin | mg/L | 59.03 | 54 | 1.19 | 2.02 | 3.30 | 5.59 |  |  |
|  |  |  |  |  |  |  |  |  |  |
| **Particles (Sysmex)** | | | | | | | | | |
| **Component** | **Unit** | **Level** | **N** | **SD** | **CV (%)** | **Expected limits** | **Expected limits (%)** | **Volume Counted (µL)** | **Expected Limits (Poisson)(%)** |
| RBC/WBC  /NLRBC | x10^6/L | 1 | 40 | 0.5 | 50% | 1.4 | 140% | 7.8 | 99% |
| RBC/WBC  /NLRBC | x10^6/L | 10 | 40 | 1.5 | 15% | 4.2 | 42% | 7.8 | 31% |
| RBC/WBC  /NLRBC | x10^6/L | 5000 | 40 | 500 | 10% | 1400 | 28% | 7.8 | 1% |
| SQEC/TREC  /RTEC | x10^6/L | 1 | 40 | 0.5 | 50% | 1.4 | 140% | 7.8 | 99% |
| SQEC/TREC  /RTEC | x10^6/L | 7 | 40 | 2.1 | 30% | 5.8 | 83% | 7.8 | 37% |
| SQEC/TREC  /RTEC | x10^6/L | 200 | 40 | 60 | 30% | 170 | 83% | 7.8 | 7% |
| Pth.cast  /hyaline casts | x10^6/L | 1 | 40 | 0.5 | 50% | 1.4 | 140% | 7.8 | 99% |
| Pth.cast  /hyaline casts | x10^6/L | 5 | 40 | 2.5 | 50% | 6.9 | 140% | 7.8 | 44% |
| Pth.cast  /hyaline casts | x10^6/L | 10 | 40 | 4 | 40% | 11 | 110% | 7.8 | 31% |
| Bact | x10^6/L | 5 | 40 | 2.5 | 50% | 6.9 | 140% | 1 | 124% |
| Bact | x10^6/L | 100 | 40 | 20 | 20% | 55 | 55% | 1 | 28% |
| Bact | x10^6/L | 10000 | 40 | 2000 | 20% | 5500 | 55% | 1 | 3% |
| Xtal | x10^6/L | 10 | 40 | 5 | 50% | 14 | 140% | 7.8 | 31% |
| Xtal | x10^6/L | 30 | 40 | 9 | 30% | 25 | 83% | 7.8 | 18% |
| Xtal | x10^6/L | 200 | 40 | 60 | 30% | 170 | 83% | 7.8 | 7% |
| YLC | x10^6/L | 1 | 40 | 0.8 | 80% | 2.2 | 220% | 7.8 | 99% |
| YLC | x10^6/L | 50 | 40 | 15 | 30% | 42 | 83% | 7.8 | 14% |
| YLC | x10^6/L | 200 | 40 | 60 | 30% | 170 | 83% | 7.8 | 7% |
| Sperm | x10^6/L | 50 | 40 | 15 | 30% | 42 | 83% | 7.8 | 14% |
| Sperm | x10^6/L | 100 | 40 | 30 | 30% | 83 | 83% | 7.8 | 10% |
| Sperm | x10^6/L | 200 | 40 | 60 | 30% | 170 | 83% | 7.8 | 7% |
|  |  |  |  |  |  |  |  |  |  |
| **Particles (Own Data)** | | | | | | | | | |
| **Component** | **Unit** | **Level** | **N** | **SD** | **CV (%)** | **Expected limits** | **Expected limits (%)** | **Volume Counted (µL)** | **Expected Limits (Poisson)(%)** |
| Bact | x10^6/L | 12 | 11 | 4.4 | 37% | 12 | 100% | 1 | 80% |
| Bact | x10^6/L | 43 | 10 | 4.6 | 11% | 13 | 30% | 1 | 42% |
| RBC | x10^6/L | 8.9 | 10 | 0.89 | 10% | 2.5 | 28% | 7.8 | 33% |
| RBC | x10^6/L | 82 | 10 | 2.7 | 3% | 7.5 | 8.3% | 7.8 | 11% |
|  |  |  |  |  |  |  |  |  |  |
| **Particles (Previtali et al)[14]** | | | | | | | | | |
| **Component** | **Unit** | **Level** | **N** | **SD** | **CV (%)** | **Expected limits** | **Expected limits (%)** | **Volume Counted (µL)** | **Expected Limits (Poisson)(%)** |
| RBC |  | 1.86 |  |  | 25.42% |  | 70% | 7.8 | 73% |
| RBC |  | 8.55 |  |  | 13.81% |  | 38% | 7.8 | 34% |
| RBC |  | 2042.12 |  |  | 1.36% |  | 4% | 7.8 | 2% |
| WBC |  | 0.87 |  |  | 37.50% |  | 104% | 7.8 | 106% |
| WBC |  | 12.81 |  |  | 10.16% |  | 28% | 7.8 | 28% |
| WBC |  | 14653.86 |  |  | 1.41% |  | 4% | 7.8 | 1% |
| EC |  | 1.45 |  |  | 35.25% |  | 98% | 7.8 | 82% |
| EC |  | 6.42 |  |  | 17.85% |  | 49% | 7.8 | 39% |
| EC |  | 204.39 |  |  | 6.30% |  | 17% | 7.8 | 7% |

Table S2
Analytical standard deviations (SDa) and coefficients of variation (CV%a) and deduced expected limits of agreement (LoAs) in natural units and in percent.
For soluble components, own data based repeated measurements of internal control materials, and derived expected LoAs are given.

For particles, data for within-run repeatability supplied by the manufacturer (Sysmex) is given. For bacteria and red blood cells own data is given. For RBC, WBC and EC data from Previtali et al is given.
For all particle counts, the volume counted and the derived expected LoAs based on Poisson distribution is given for comparison. Generally, the theoretical LoAs, based on Poisson distribution are similar to the observed values from Previtali et al and our own data.

Materials used for own data: Urine samples (bacteria), spiked isotonic saline (red blood cells) and internal controls (soluble components).
