# Supplementary material for: Pneumatic tube transportation of urine samples
Source: publisher site journal article supplement (doi:10.1515/cclm-2020-1198), 2020-11-23
Supplement: Supplementary file 3 [file j_cclm-2020-1198_suppl_003.docx]

**Supplemental material 3**

|  |  |  |  |  |  | Courier | | | | PTS | Difference (PTS-courier) | Difference (PTS/courier, %) | |
| --- | --- | --- | --- | --- | --- | --- | --- | --- | --- | --- | --- | --- | --- |
| Analyte | Level  (mean) | unit | N | LoD | Upper limit of quantitation | Minimum | Median | Maximum | Mean | Mean | Mean (95%CI) | Lower Limit of Agreement (95%CI) | Upper Limit of Agreement (95%CI) |
| Albumin | <20 | mg/L | 54 | 3 | 4400 | 3.00 | 3.5 | 18.2 | 6.16 | 6.01 | -0.15  (-0.344 to 0.0437) | -19.7  (-23.5 to -15.7) | 20.1  (14.4 to 26.1) |
| Albumin | >/=20 | mg/L | 46 | 3 | 4400 | 19.9 | 181 | 2390 | 470 | 470 | 3.23  (-2.85 to 9.32) | -3.92  (-4.96 to -2.86) | 4.44  (3.31 to 5.59) |
| Albumin-to-Creatinine Ratio | <10 | mg/mmol | 64 | N/A | N/A | 0.113 | 1.02 | 8.60 | 1.71 | 1.73 | 0.0141  (-0.0278 to 0.0561) | -18.3  (-21.8 to -14.6) | 21.6  (16.4 to 27.0) |
| Albumin-to-Creatinine Ratio | >/=10 | mg/mmol | 36 | N/A | N/A | 11.9 | 53.7 | 437 | 97.3 | 97.8 | 0.506  (-0.806 to 1.88) | -4.99  (-6.48 to -3.47) | 5.61  (3.96 to 7.30) |
| Creatinine | <5 | mmol/L | 41 | 0.1 | 135 | 0.87 | 3.07 | 5 | 3.16 | 3.15 | -0.0132  (-0.0387 to 0.0123) | -6.51  (-8.11 to -4.89) | 5.76  (3.96 to 7.6) |
| Creatinine | >/=5 | mmol/L | 59 | 0.1 | 135 | 5.33 | 8.34 | 34.1 | 10.7 | 10.7 | -0.0336  (-0.103 to 0.0359) | -4.82  (-5.85 to -3.77) | 4.64  (3.5 to 5.79) |
| Potassium | All | mmol/L | 99 | 3 | 100* | 6.34 | 36.6 | 172 | 40.4 | 40,5 | 0.114  (-0.276 to 0.505) | -8.35  (-9.71 to -6.97) | 8.62  (7.00 to 10.3) |
| Protein | <0.15 | g/L | 63 | 0 | 6000 | 0.04 | 0.06 | 0.14 | 0.07 | 0.07 | 0.000048 (-0.00103 to 0.00112) | -11.5  (-13.9 to -9.11) | 12.7  (9.67 to 15.7) |
| Protein | >/=0.15 | g/L | 37 | 0 | 6000 | 0.15 | 0.35 | 2.94 | 0.76 | 0.76 | -0.00297 (-0.00866 to 0.00271) | -5.14  (-6.51 to -3.74) | 4.78  (3.25 to 6.32) |
| Sodium | <100 | mmol/L | 66 | 20 | 350 | 20.0 | 62.9 | 99.7 | 61.2 | 62,4 | 1.17  (-0.307 to 2.64) | -17.1  (-20.8 to -13.2) | 26.4  (20.7 to 32.3) |
| Sodium | >/=100 | mmol/L | 34 | 20 | 350 | 100 | 140 | 260 | 150 | 150 | 0.271  (-0.903 to 1.44) | -4.88  (-6.42 to -3.32) | 5.75  (4.03 to 7.49) |
| Urea Nitrogen | All | mmol/L | 100 | 1 | 3600 | 27.9 | 160 | 516 | 178 | 178 | 0.0470  (-0.808 to 0.902) | -5.42  (-6.34 to -4.49) | 5.75  (4.72 to 6.79) |

Table S3 - A: Soluble components. * Manual dilution of samples for extended upper limit of quantification of 1000 mmol/L.

|  |  |  |  |  |  | Courier | | | | PTS | Difference (PTS-courier) | %Difference (PTS/courier) | |
| --- | --- | --- | --- | --- | --- | --- | --- | --- | --- | --- | --- | --- | --- |
| Analyte | Level  (mean) | unit | N | LoD | Upper limit of quantitation | Minimum | Median | Maximum | Mean | Mean | Mean (95%CI) | Lower Limit of Agreement (95%CI) | Upper Limit of Agreement (95%CI) |
| Bacteria | 5-30 | x10^6/L | 25 | 5 | 10000 | 25 | 3.4 | 32 | 15 | 16 | 1.2  (-1.2 to 3.7) | -57  (-69 to -41) | 150  (82 to 250) |
| Bacteria | 30-1000 | x10^6/L | 31 | 5 | 10000 | 41 | 150 | 1000 | 250 | 260 | 8.8  (-7.5 to 25) | -19  (-24 to -13) | 26  (17 to 35) |
| Bacteria | 1000-10000 | x10^6/L | 14 | 5 | 10000 | 1100 | 2300 | 6600 | 3200 | 3200 | 78  (-37 to 190) | -11  (-17 to -5.6) | 14  (6.7 to 21) |
| Crystals | All | x10^6/L | 1 | 10 | 200 | 54 | 54 | 54 | 54 | 51 | -3.4 |  |  |
| Hyaline Casts | All | x10^6/L | 6 | 1 | 30 | 0.82 | 1.9 | 6.3 | 2.6 | 3.1 | 0.54  (-0.75 to 1.8) | -36  (-64 to -12) | 120  (23 to 280) |
| Non-lysed Red Blood Cells | 1-10 | x10^6/L | 64 | 1 | 10000 | 0 | 2.6 | 8.5 | 3.2 | 4.1 | 0.91  (0.42 to 1.4) | -62  (-71 to -50) | 370  (260 to 510) |
| Non-lysed Red Blood Cells | 10-50 | x10^6/L | 14 | 1 | 10000 | 12 | 17 | 48 | 20 | 21 | 0.39  (-1 to 1.8) | -22  (-32 to -11) | 34  (16 to 53) |
| Non-lysed Red Blood Cells | >/=50 | x10^6/L | 8 | 1 | 10000 | 60 | 160 | 2000 | 470 | 480 | 10  (-6.5 to 27) | -6.6  (-11 to -1.7) | 7.2  (1.9 to 13) |
| Pathological casts | All | x10^6/L | 1 | 1 | 30 | 2.51 | 2.51 | 2.51 | 2.51 | 4.74 | 2.23 |  |  |
| Red Blood Cells | 1-10 |  | 71 | 1 | 10000 | 0 | 3 | 9.3 | 3.5 | 4.6 | 1.1  (0.58 to 1.6) | -60  (-69 to -48) | 380  (270 to 530) |
| Red Blood Cells | 10-50 | x10^6/L | 14 | 1 | 10000 | 14 | 18 | 37 | 20 | 21 | 1.2  (-0.68 to 3.1) | -23  (-35 to -9.7) | 47  (24 to 73) |
| Red Blood Cells | >50 | x10^6/L | 9 | 1 | 10000 | 52 | 120 | 2100 | 440 | 450 | 11  (-6.3 to 28) | -6.6  (-11 to -2) | 7.6  (2.6 to 13) |
| Renal Tubular Epithelial Cells | <2.5 | x10^6/L | 24 | 1 | 200 | 0.70 | 1.3 | 2.5 | 1.3 | 1.8 | 0.44  (0.14 to 0.73) | -44  (-59 to -23) | 200  (120 to 310) |
| Renal Tubular Epithelial Cells | >/=2.5 | x10^6/L | 27 | 1 | 200 | 2.8 | 5.5 | 19 | 6.2 | 5.7 | -0.46  (-1.1 to 0.15) | -43  (-52 to -32) | 54  (29 to 83) |
| Spermatozoa | All | x10^6/L | 0 | 50 | 200 |  |  |  |  |  |  |  |  |
| Squamous Epithelial Cells | <10 | x10^6/L | 25 | 1 | 200 | 1 | 2.9 | 9.8 | 3.9 | 3.9 | -0.048  (-0.5 to 0.41) | -45  (-55 to -32) | 71  (39 to 110) |
| Squamous Epithelial Cells | >/= 10 | x10^6/L | 32 | 1 | 200 | 10 | 23 | 150 | 35 | 33 | -1.1  (-3.4 to 1.1) | -23  (-29 to -17) | 26  (16 to 36) |
| Transitional Epithelial Cells | All | x10^6/L | 11 | 1 | 200 | 0.4 | 1.3 | 37 | 5.3 | 5.4 | 0.13  (-1.3 to 1.5) | -74  (-89 to -40) | 330  (88 to 900) |
| White Blood Cells | 1-15 | x10^6/L | 50 | 1 | 10000 | 1 | 3.5 | 13 | 4.6 | 5.2 | 0.54  (-0.067 to 1.2) | -51  (-60 to -40) | 140  (100 to 200) |
| White Blood Cells | 15-50 | x10^6/L | 16 | 1 | 10000 | 16 | 25 | 41 | 26 | 26 | -0.16  (-2 to 1.7) | -27  (-37 to -17) | 30  (14 to 50) |
| White Blood Cells | 50-1000 | x10^6/L | 15 | 1 | 10000 | 55 | 120 | 380 | 170 | 170 | 4.8  (-8.3 to 18) | -16  (-23 to -9) | 19  (9 to 29) |
| White Blood Cells | >/=1000 | x10^6/L | 4 | 1 | 10000 | 1000 | 5600 | 16000 | 7200 | 7000 | -150  (-420 to 130) | -4.6  (-8.6 to -0.34) | 1.5  (-2.8 to 6) |
| Yeast-like Cells | <4 | x10^6/L | 21 | 1 | 200 | 0.0 | 1.3 | 3.4 | 1.4 | 2.0 | 0.55  (0.13 to 0.96) | -48  (-65 to -22) | 270  (150 to 450) |
| Yeast-like Cells | >/=4 | x10^6/L | 3 | 1 | 200 | 4.1 | 32 | 330 | 120 | 130 | 8.9  (-37 to 55) | -85  (-100 to 3700) | 2200  (-91 to 570000) |

Table S3-B: particles.
